# Supplementary material for: The Dynamic Change in Fatty Acids during the Postharvest Process of Oolong Tea Production
Source: MDPI journal article supplement (doi:10.3390/molecules27134298), 2022-07-04
Supplement: s1 [file s1]

Supplementary Materials

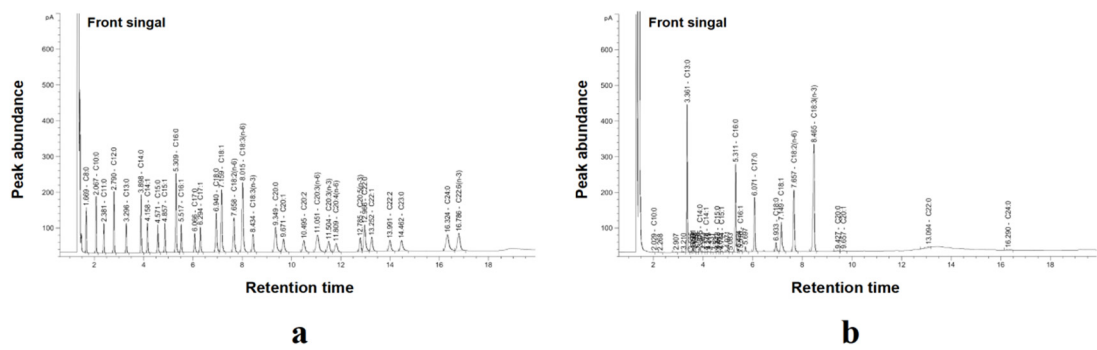

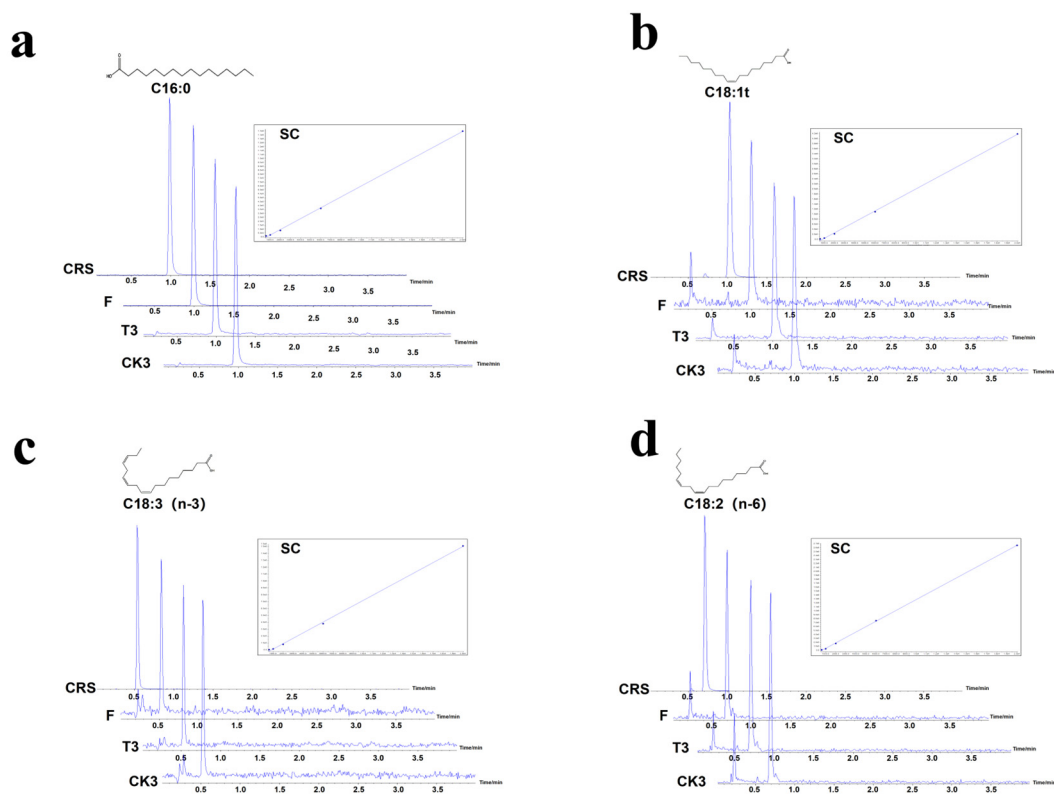

**Figure S2.** Chromatogram and standard curve of four fatty acids in tea samples during the post-harvest process of oolong tea production production (a) palmitate. (b) trans-9-elaidic acid. (c)  $\alpha$ -linolenic acid. (d) linoleic acid; Note: SC: standard curve; CRS: Chemical reference substance; F: fresh leaves; T3: turn-over leaves; CK3: indoor-withered leaves

**Table S1.** The information of 37 types of fatty acid methyl esters mixed referencing standards

| Name                                                  | Types       | Concentration | CAS        |
|-------------------------------------------------------|-------------|---------------|------------|
| Methyl butyrate                                       | C4:0        | 400 µg/mL     | 623-42-7   |
| Methyl hexanoate                                      | C6:0        | 400 µg/mL     | 106-70-7   |
| Methyl octanoate                                      | C8:0        | 400 µg/mL     | 111-11-5   |
| Methyl decanoate                                      | C10:0       | 400 µg/mL     | 110-42-9   |
| Methyl undecanoate                                    | C11:0       | 200 µg/mL     | 1731-86-8  |
| Methyl laurate                                        | C12:0       | 400 µg/mL     | 29972-79-0 |
| Methyl tridecanoate                                   | C13:0       | 200 µg/mL     | 1731-88-0  |
| Methyl myristate                                      | C14:0       | 400 µg/mL     | 124-10-7   |
| Methyl myristoleate                                   | C14:1       | 200 µg/mL     | 56219-06-8 |
| Methyl pentadecanoate                                 | C15:0       | 200 µg/mL     | 7132-64-1  |
| Methyl cis-10-pentadecenoate                          | C15:1       | 200 µg/mL     | 7132-64-1  |
| Methyl palmitate                                      | C16:0       | 600 µg/mL     | 90176-52-6 |
| Methyl palmitoleate                                   | C16:1       | 200 µg/mL     | 1120-25-8  |
| Methyl heptadecanoate                                 | C17:0       | 200 µg/mL     | 1731-92-6  |
| cis-10-Heptadecanoic acid methyl ester                | C17:1       | 200 µg/mL     | 75190-82-8 |
| Methyl stearate                                       | C18:0       | 400 µg/mL     | 112-61-8   |
| trans-9-Elaidic acid methyl ester                     | C18:1t      | 200 µg/mL     | 2462-84-2  |
| cis-9-Oleic acid methyl ester                         | C18:1c      | 400 µg/mL     | 112-62-9   |
| Methyl linolelaidate                                  | C18:2(n-6t) | 200 µg/mL     | 2566-97-4  |
| Methyl linoleate                                      | C18:2(n-6c) | 200 µg/mL     | 112-63-0   |
| Methyl arachidate                                     | C20:0       | 400 µg/mL     | 1120-28-1  |
| Methyl γ-linolenate                                   | γ-C18:3     | 200 µg/mL     | 7361-80-0  |
| Methyl cis-11-eicosenoate                             | C20:1 (n-9) | 200 µg/mL     | 2390-09-2  |
| Methyl linolenate                                     | α-C18:3     | 200 µg/mL     | 7361-80-0  |
| Methyl heneicosanoate                                 | C21:0       | 200 µg/mL     | 6064-90-0  |
| cis-11,14-Eicosadienoic acid methyl ester             | C20:2       | 200 µg/mL     | 61012-46-2 |
| Methyl behenate                                       | C22:0       | 400 µg/mL     | 929-77-1   |
| cis-8,11,14-Eicosatrienoic acid methyl ester          | C20:3(n-6)  | 200 µg/mL     | 21061-10-9 |
| Methyl erucate                                        | C22:1       | 200 µg/mL     | 1120-34-9  |
| cis-11,14,17-Eicosatrienoic acid methyl ester         | C20:3(n-3)  | 200 µg/mL     | 55682-88-7 |
| cis-5,8,11,14-Eicosatetraenoic acid methyl ester      | C20:4       | 200 µg/mL     | 2566-89-4  |
| Methyl tricosanoate                                   | C23:0       | 200 µg/mL     | 2433-97-8  |
| cis-13,16-Docosadienoic acid methyl ester             | C22:2       | 200 µg/mL     | 61012-47-3 |
| Methyl lignocerate                                    | C24:0       | 400 µg/mL     | 2442-49-1  |
| cis-5,8,11,14,17-Eicosapentaenoic acid methyl ester   | C20:5 (n-3) | 200 µg/mL     | 2734-47-6  |
| Methyl nervonate                                      | C24:1       | 200 µg/mL     | 2733-88-2  |
| cis-4,7,10,13,16,19-Docosahexaenoic acid methyl ester | C22:6 (n-3) | 200 µg/mL     | 301-01-9   |

Note: “m” and “n” indexes of C<sub>m</sub>:<sub>n</sub> represent the number of carbon atoms and unsaturated double bonds in the fatty acid carbon chain, respectively. (n-3), (n-6) and (n-9) indicate that the first double bond of fatty acid starting from the methyl end is between 3 and 4, 6 and 7, 9 and 10, respectively. c, t represent the *cis*- and *trans*- conformations of fatty acids, respectively.

**Table S2.** Mass spectrometry parameters of four fatty acids

| Fatty acid               | Product ion<br>(m/z) | Daughter ion<br>(m/z) | DP (V) | CE(V) | CXP(V) |
|--------------------------|----------------------|-----------------------|--------|-------|--------|
| Palmitate                | 301.1                | 255.0                 | -28    | -10   | -9     |
| (C16:0)                  | 301.1                | 45                    | -28.7  | -21   | -4     |
| trans-9-Elaidic acid     | 327.1                | 281.1                 | -36    | -11   | -6     |
| (C18:1t)                 | 327.1                | 45.0                  | -34    | -32   | -5     |
| $\alpha$ -linolenic acid | 323.0                | 277.1                 | -26    | -10   | -6     |
| (C18:3 (n-3))            |                      |                       | -33    | -29   | -6     |
| linoleic acid            | 325.2                | 279.1                 | -31    | -10   | -6     |
| (C18:2 (n-6))            |                      | 45.1                  | -30    | -30   | -4.3   |

DP: declustering potential; CE: collision energy; CXP: collision cell exit potential
